# Supplementary material for: A nitrogen fixation strategy to synthesize NO via the thermally assisted photocatalytic conversion of air
Source: Royal Society of Chemistry journal article supplement (doi:10.1039/d0ta06747d), 2020-01-01
Supplement: d0ta06747d1.pdf [file d0ta06747d1.pdf]

## Supporting Information

### **A nitrogen fixation strategy to synthesize NO via the thermally-assisted photocatalytic conversion of air**

Yu Yu<sup>a,†</sup>, Changhong Wang<sup>a,†</sup>, Yifu Yu<sup>a,\*</sup>, Yanmei Huang<sup>a</sup>, Cuibo Liu<sup>a</sup>, Siyu Lu<sup>c</sup>, Bin Zhang<sup>a,b,\*</sup>

<sup>a</sup>Department of Chemistry, School of Science, Institute of Molecular Plus, Tianjin University, Tianjin 300072, China

<sup>b</sup>Tianjin Key Laboratory of Molecular Optoelectronic Sciences, Frontiers Science Center for Synthetic Biology (Ministry of Education), Tianjin University, Tianjin 300072, China

<sup>c</sup>Green Catalysis Center, College of Chemistry, Zhengzhou University, Zhengzhou 450000, China

<sup>†</sup>These authors contributed equally to this work.

#### **\*Corresponding authors**

E-mail: yyu@tju.edu.cn; bzhang@tju.edu.cn

## Additional Results and Discussion

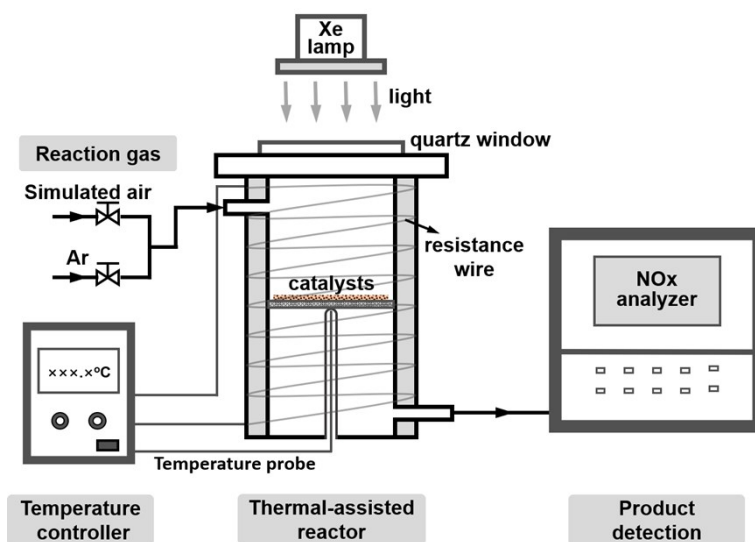

**Scheme S1.** Schematic illustration for the thermal-assisted photocatalytic  $N_2$  oxidation reactor.

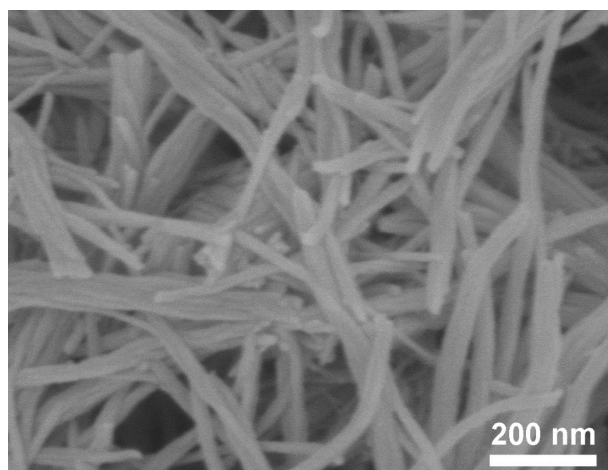

**Fig. S1** SEM image of  $\text{WO}_3$  nanorods

SEM image showed that  $\text{WO}_3$  nanorods were produced on a large scale.

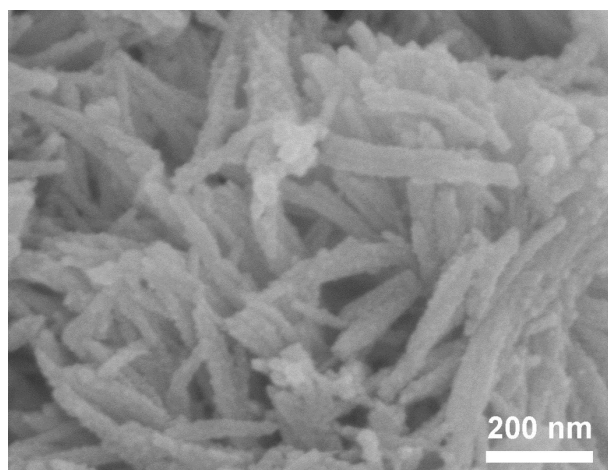

**Fig. S2** SEM image of the TiO<sub>2</sub>/WO<sub>3</sub> heterostructured nanorods. The surface of WO<sub>3</sub> nanorods becomes rough after growing TiO<sub>2</sub>.

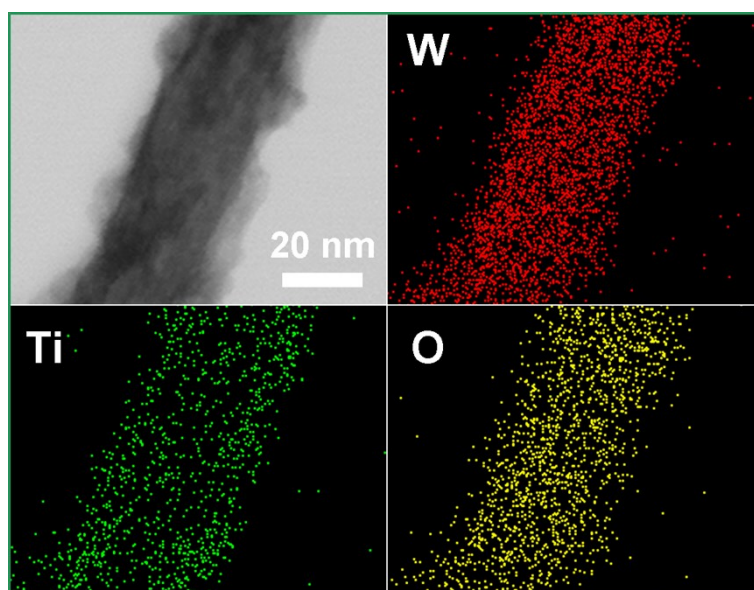

**Fig. S3** Element mapping images of the  $\text{TiO}_2/\text{WO}_3$  heterostructured nanorods.

STEM-EDS elemental mapping images revealed the elemental distribution. W and Ti elements distributed in core and shell, respectively, while oxygen existed in both core and shell. A thin layer of nanosheets coated on the  $\text{WO}_3$  to produce the  $\text{TiO}_2/\text{WO}_3$  heterostructured nanorods.

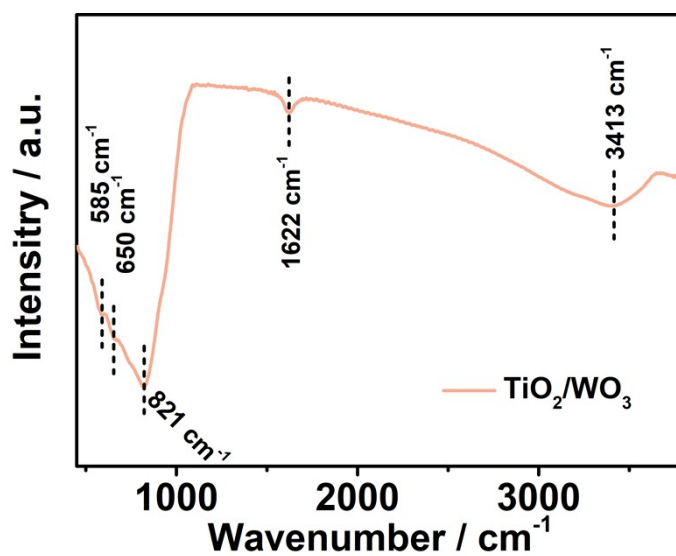

**Fig. S4** FTIR spectrum of the TiO<sub>2</sub>/WO<sub>3</sub> heterostructured nanorods.

The peaks located at 3413 and 1622 cm<sup>-1</sup> were due to the stretching and bending vibrations of the surface adsorbed water molecules. And the peaks located at 585 and 650 cm<sup>-1</sup> were attributed to the stretching vibrations of Ti-O bond in TiO<sub>2</sub>. Moreover, the W-O stretching and vibration bands in the region 960 cm<sup>-1</sup> to 800 cm<sup>-1</sup> were also detected.

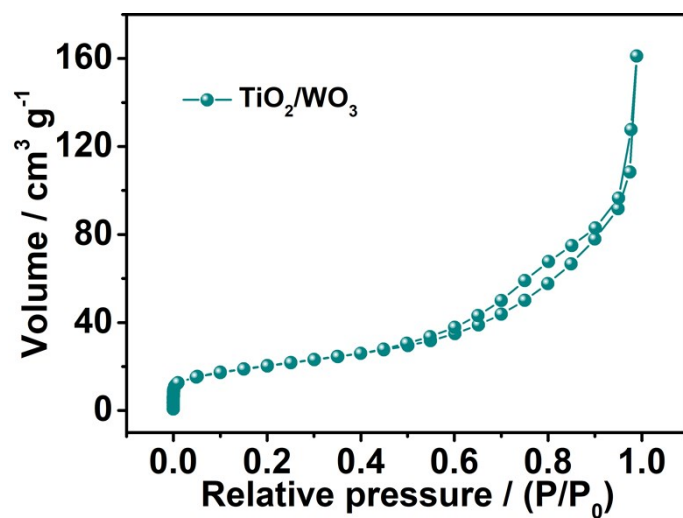

**Fig. S5** N<sub>2</sub> adsorption-desorption isotherm for TiO<sub>2</sub>/WO<sub>3</sub> heterostructured nanorods.

The BET surface area of TiO<sub>2</sub>/WO<sub>3</sub> heterostructured nanorods was calculated to be 72.0 m<sup>2</sup> g<sup>-1</sup>.

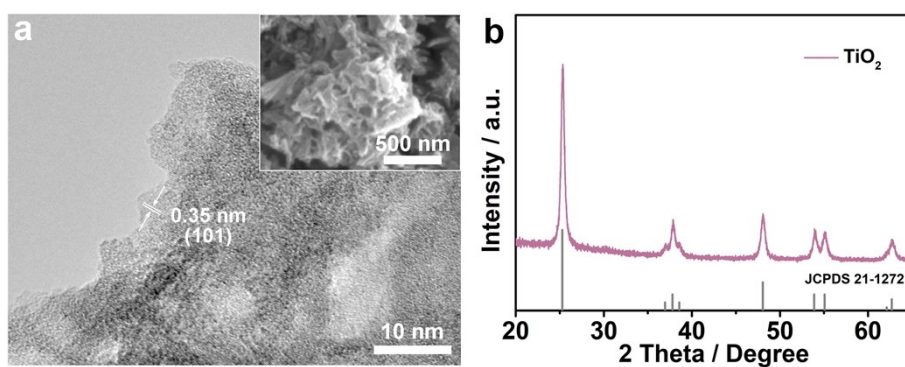

**Fig. S6** (a) HRTEM image (inset is the SEM image) and (b) XRD pattern of TiO<sub>2</sub> nanosheets.

SEM image (inset in Fig. S6a) showed the assembled nanosheet structure of TiO<sub>2</sub> nanosheets. HRTEM image (Fig. S6a) displayed the crystal structure of nanosheets with TiO<sub>2</sub> (101) plane. X-ray diffraction (XRD) pattern (Fig. S6b) further proved the nanosheets as pure TiO<sub>2</sub> (JCPDS No. 21-1272).



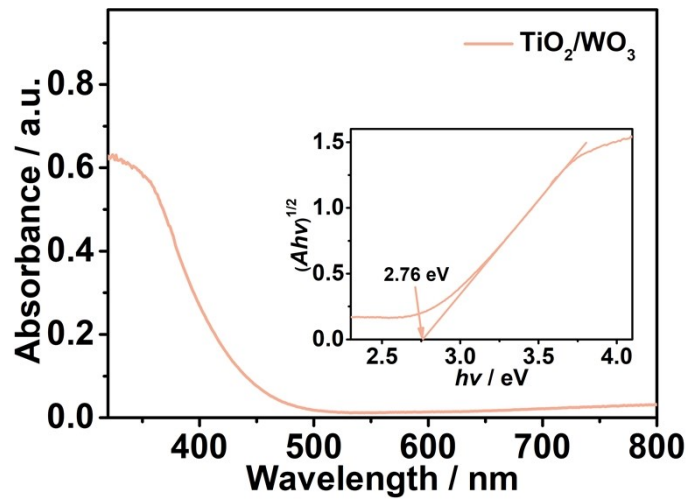

**Fig. S7** UV-Vis absorbance spectra and the Tauc plots (inset) of the TiO<sub>2</sub>/WO<sub>3</sub> heterostructured nanorods.

The intercepts of extrapolated straight lines of Tauc plots showed the corresponding bandgaps (2.76 eV) of the TiO<sub>2</sub>/WO<sub>3</sub> heterostructured nanorods.

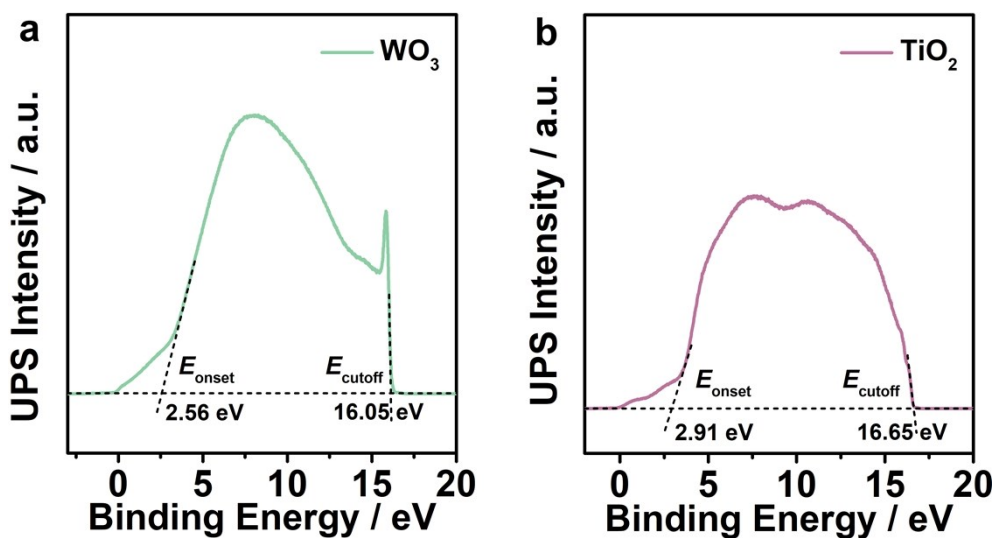

**Fig. S8** UPS spectra of (a)  $\text{WO}_3$  nanorods and (b)  $\text{TiO}_2$  nanosheets.

Ultraviolet photoelectron spectroscopy (UPS) was used to determine the ionization potential [equivalent to the valence band energy ( $E_v$ )] of  $\text{WO}_3$  nanorods and  $\text{TiO}_2$  nanosheets, which was calculated to be 7.48 eV and 7.73 eV by subtracting the width of the He I UPS spectra from the excitation energy (21.22 eV). The detailed calculations were shown as follows:

$$\text{The } E_v \text{ versus vacuum level (eV)} = 21.22 \text{ eV} - (E_{\text{cutoff}} - E_{\text{onset}})$$

$$\text{The } E_v \text{ versus NHE (V)} = (\text{The } E_v \text{ versus vacuum level} - 4.85) \text{ (V)} \text{ (pH} = 7)$$

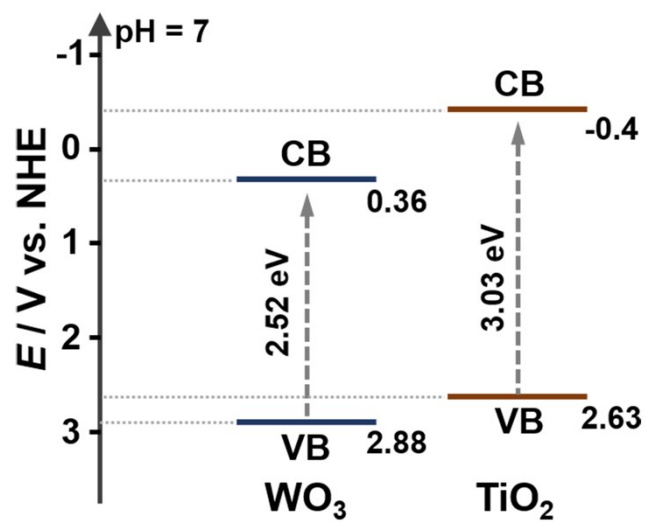

**Fig. S9** The schematic diagram for the band structures of  $\text{WO}_3$  nanorods and  $\text{TiO}_2$  nanosheets.

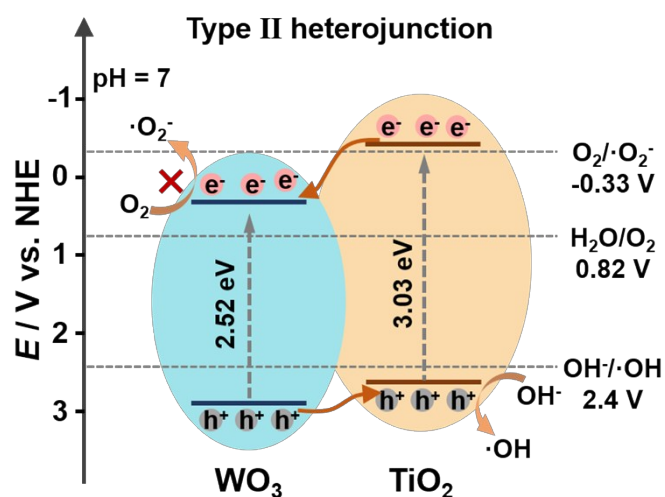

**Fig. S10** Schematic illustration for the charge-carriers migration according to the type-II heterojunction mechanism in the  $\text{TiO}_2/\text{WO}_3$  heterostructured nanorods.

Considering that the CB potential of  $\text{WO}_3$  was more positive than the standard potential of  $\text{O}_2/\cdot\text{O}_2^-$  (-0.33 V vs NHE), no obvious  $\cdot\text{O}_2^-$  signal should be observed if the photogenerated charge-carriers migration followed the type-II heterojunction mechanism.

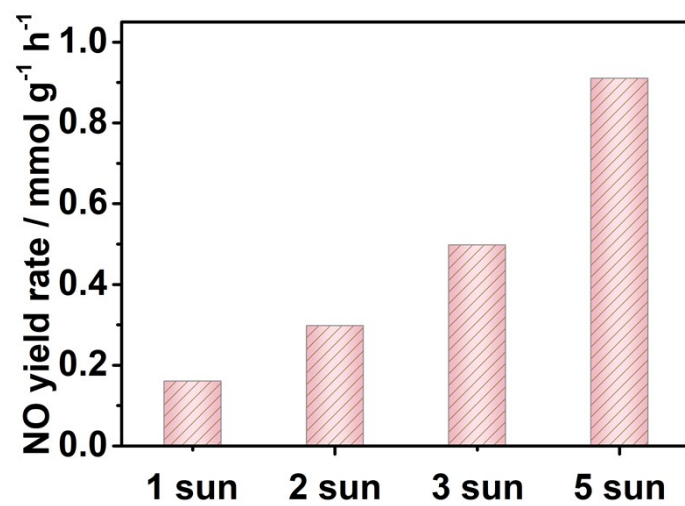

**Fig. S11** NO yield rate under different illumination intensity at 300 °C.

The yield rate of NO increased obviously with the increase of the illumination intensity from 1 sun to 5 sun.

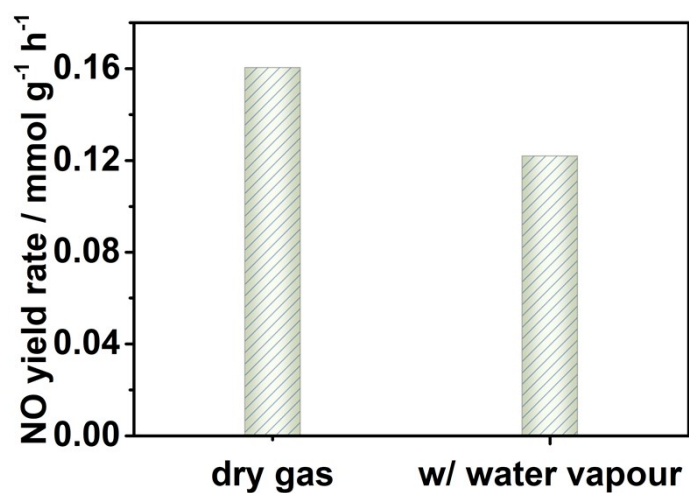

**Fig. S12** Effect of water vapour on the yield rate of NO.

The yield rate of NO using the wet simulated air as the feed gas under 1 sun illumination at 300 °C was 0.12 mmol g<sup>-1</sup> h<sup>-1</sup>, which was slight lower than that using the dry simulated air as the feed gas (0.16 mmol g<sup>-1</sup> h<sup>-1</sup>).

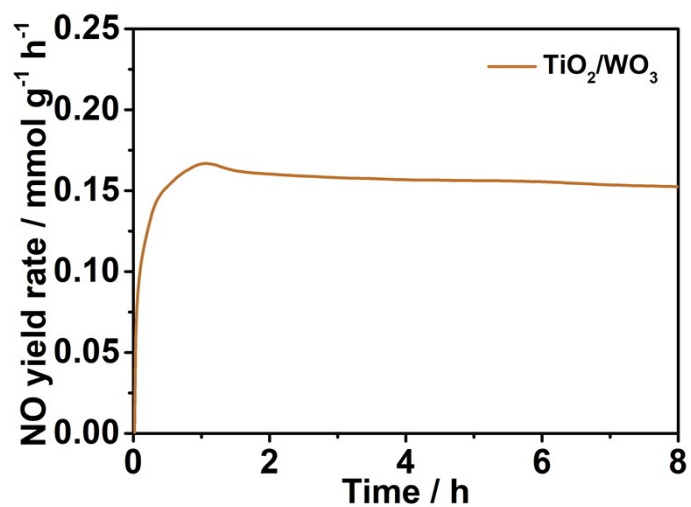

**Fig S13.** The time-dependent yield rate of NO over TiO<sub>2</sub>/WO<sub>3</sub> heterostructures for continuous 8 hours test.

No obvious decline can be seen for the yield rate of NO, suggesting the well stability of the TiO<sub>2</sub>/WO<sub>3</sub> heterostructures for photocatalytic oxidation of nitrogen.

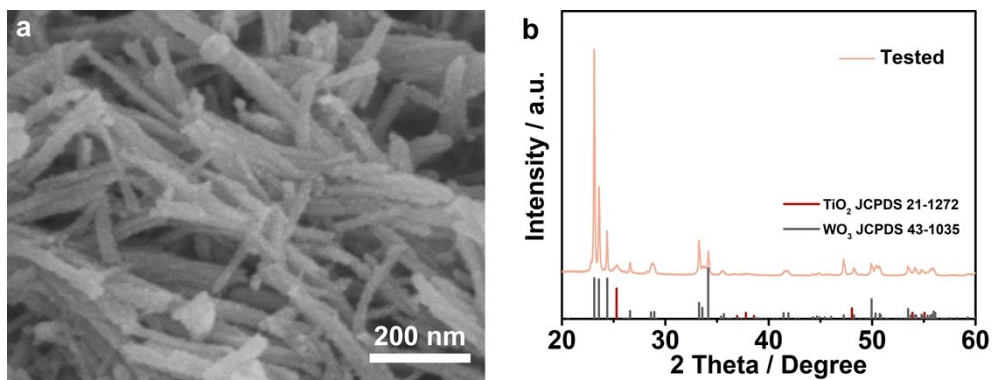

**Fig. S14** (a) SEM image and (b) XRD pattern of the  $\text{TiO}_2/\text{WO}_3$  heterostructured nanorods after 8 hours test.

The morphology and crystalline structure of the  $\text{TiO}_2/\text{WO}_3$  heterostructured nanorods maintained well after long-term test.



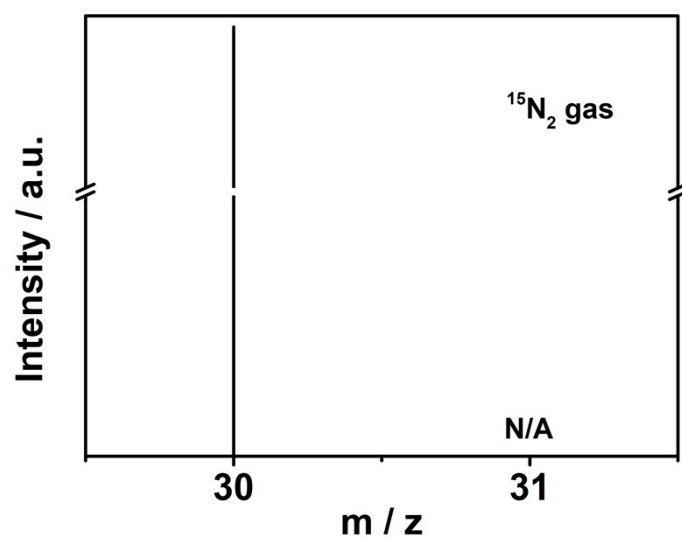

**Fig. S15** Mass spectra of GC-MS analysis of the in the <sup>15</sup>N<sub>2</sub> gas for the isotope experiment.

No <sup>15</sup>NO (m/z = 31) was detected in the <sup>15</sup>N<sub>2</sub> gas.

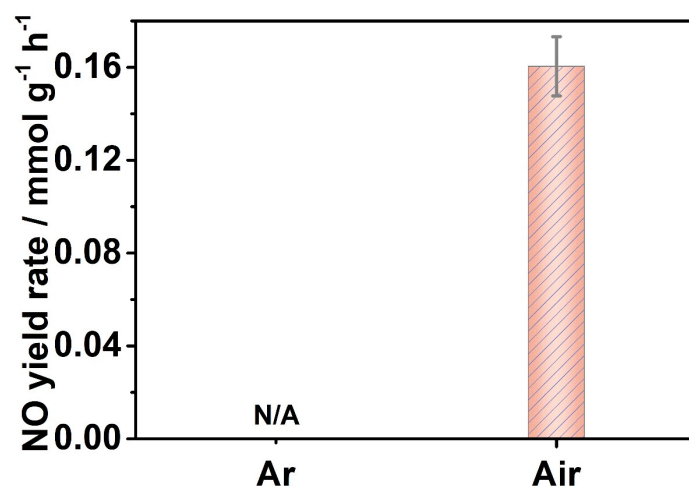

**Fig. S16** Blank experiment: yield rate of NO production using different gas as the reactant.

No NO was detected in the argon atmosphere.

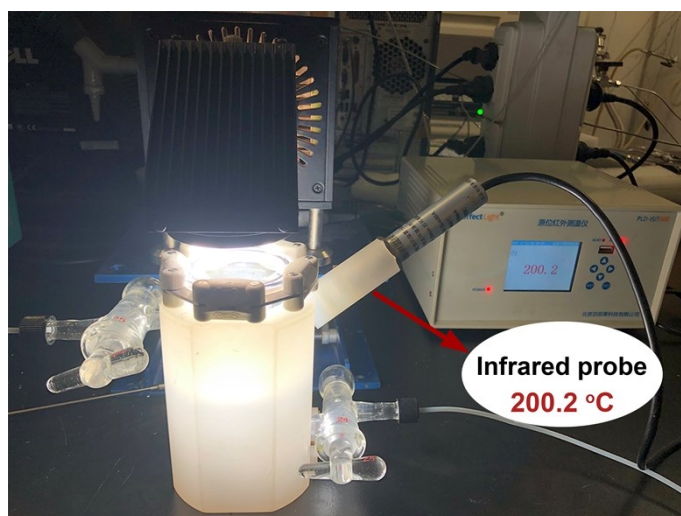

**Fig. S17** Photograph of the device for photocatalytic N<sub>2</sub> oxidation under 10 sunlight illumination equipped with infrared thermometer for the detection of temperature on the surface of catalysts.

The temperature at the photocatalyst surface could achieve 200 °C as the incident light intensity was 10 sun.

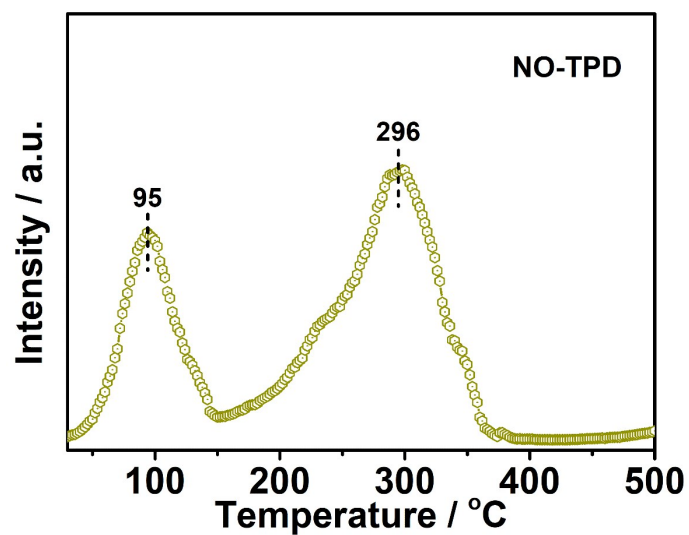

**Fig. S18** Temperature programmed desorption (TPD) profile of NO over TiO<sub>2</sub>/WO<sub>3</sub> heterostructures.

In the NO TPD profile, there were two peaks at about 95 °C and 296 °C, which were attributed to the physical adsorption and chemical adsorption of NO on the TiO<sub>2</sub>/WO<sub>3</sub> heterostructures, respectively.

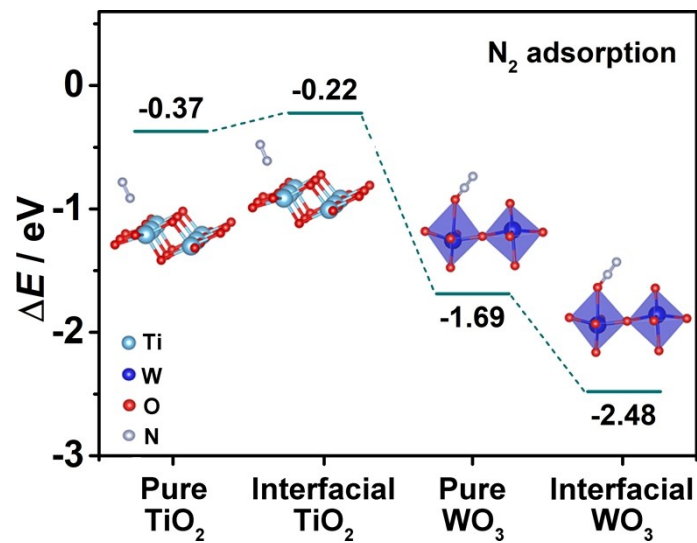

**Fig. S19**  $\text{N}_2$  adsorption energies on different samples.

Pure  $\text{WO}_3$  (-1.69 eV) and interfacial  $\text{WO}_3$  in  $\text{TiO}_2/\text{WO}_3$  heterostructures (-2.48 eV) showed more negative adsorption energies than those of pure  $\text{TiO}_2$  (-0.37 eV) and interfacial  $\text{TiO}_2$  in  $\text{TiO}_2/\text{WO}_3$  heterostructure (-0.22 eV). This result revealed that  $\text{N}_2$  photooxidation proceeded on the surface of  $\text{WO}_3$  in the  $\text{TiO}_2/\text{WO}_3$  heterostructures and interfacial charge transfer facilitated  $\text{N}_2$  adsorption.

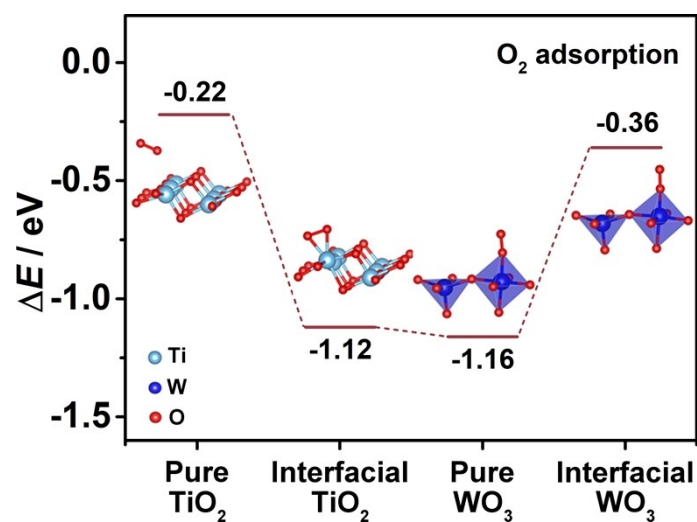

**Fig. S20**  $\text{O}_2$  adsorption energies on different sample surfaces.

In the  $\text{TiO}_2/\text{WO}_3$  heterostructure, the interfacial  $\text{TiO}_2$  showed more negative adsorption energy of  $\text{O}_2$  (-1.12 eV) than that of interfacial  $\text{WO}_3$  (-0.36 eV), indicating that  $\text{O}_2$  showed preferential adsorption on the interfacial  $\text{TiO}_2$  and further reduced by the photoelectrons under irradiation.

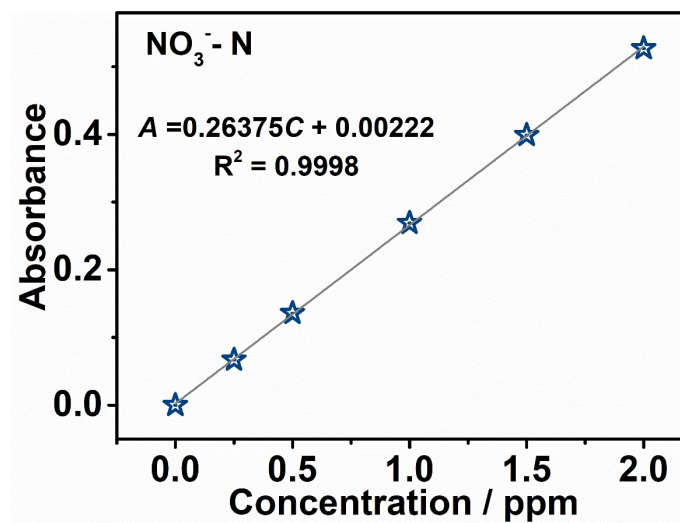

**Fig. S21** The UV-Vis absorption spectra and the corresponding calibration curves of NO<sub>3</sub><sup>-</sup>-N.

The calibration curves showed good linearity.

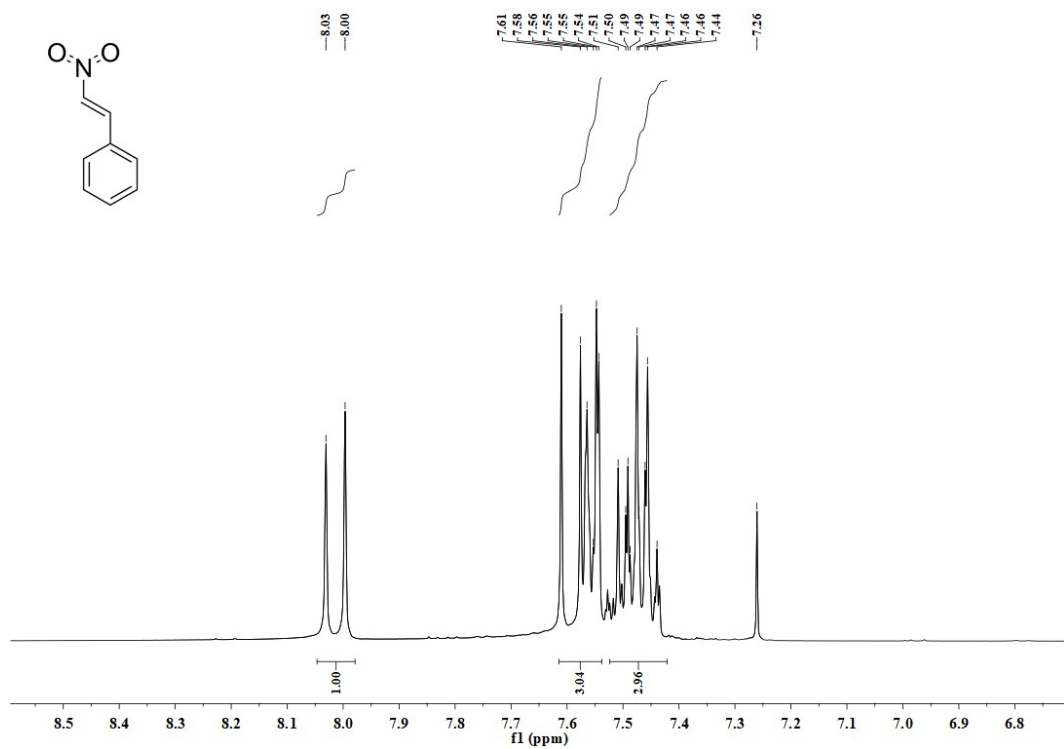

**Fig. S22** NMR spectrum of the  $\beta$ -Nitrostyrene product.

$^1\text{H}$  NMR (400 MHz,  $\text{CDCl}_3$ )  $\delta$  [ppm] 8.01 (d,  $J = 13.6$ , 1H), 7.56 (m, 3H), 7.48 (m, 3H);



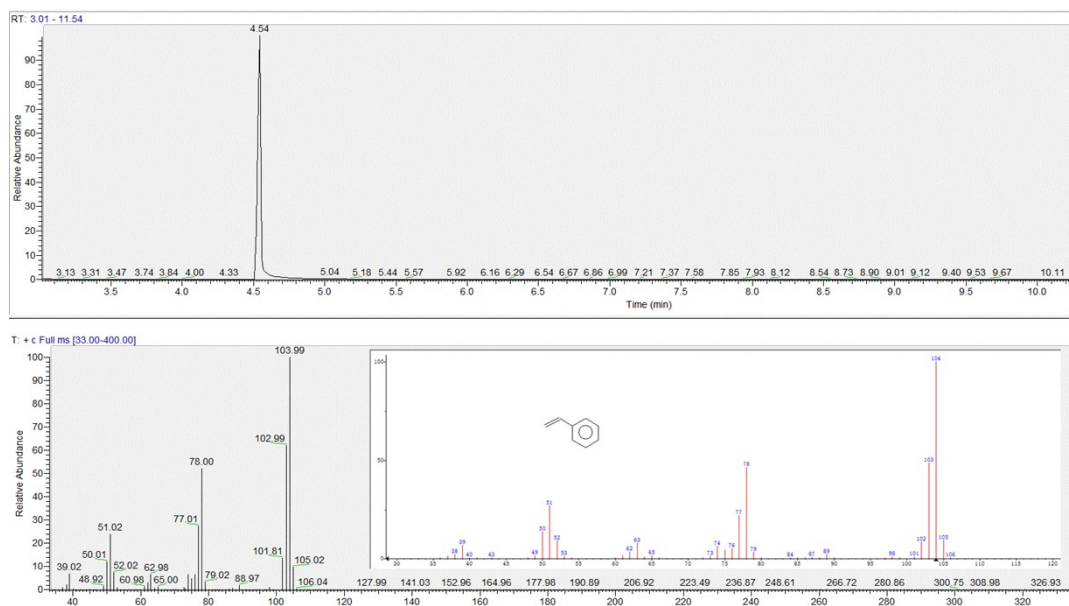

**Fig. S23** GC spectrum of the product after the test with the Ar gas as the raw material. No  $\beta$ -Nitrostyrolene product generated in the organic solvent system when Ar gas was used as the raw material for photocatalysis.
